# Supplementary material
Source: HighWire-hosted journal article supplement (https://bmjopen.bmj.com/content/12/10/e062951)
Supplement: inline-supplementary-material-2 [file inline-supplementary-material-2.pdf]

*Effect of social prescribing link workers on health outcomes and costs for adults in primary care and community settings. A systematic review.*

|    | PubMed<br>21/07/2021                                        | Items |
|----|-------------------------------------------------------------|-------|
| 1  | "wellbeing program**"                                       | 59    |
| 2  | "community health advisor**"                                | 95    |
| 3  | "community health worker**"                                 | 8536  |
| 4  | "community facilitator**"                                   | 48    |
| 5  | "community navigator**"                                     | 17    |
| 6  | "community referral**"                                      | 186   |
| 7  | "lay health worker**"                                       | 421   |
| 8  | "link-worker**"                                             | 85    |
| 9  | "link worker**"                                             | 85    |
| 10 | "linkworker**"                                              | 26    |
| 11 | "patient navigator**"                                       | 584   |
| 12 | "social prescri**"                                          | 240   |
| 13 | 1 OR 2 OR 3 OR 4 OR 5 OR 6 OR 7 OR 8 OR 9 OR 10 OR 11 OR 12 | 9983  |

|    | EMBASE on Embase.com<br>21/07/2021                          | Items |
|----|-------------------------------------------------------------|-------|
| 1  | 'wellbeing program**'                                       | 234   |
| 2  | 'community health advisor**'                                | 11    |
| 3  | 'community health worker**'                                 | 6272  |
| 4  | 'community facilitator**'                                   | 65    |
| 5  | 'community navigator**'                                     | 44    |
| 6  | 'community referral**'                                      | 324   |
| 7  | 'lay health worker**'                                       | 554   |
| 8  | 'link-worker**'                                             | 105   |
| 9  | 'link worker**'                                             | 105   |
| 10 | 'linkworker**'                                              | 23    |
| 11 | 'patient navigator**'                                       | 1225  |
| 12 | 'social prescri**'                                          | 284   |
| 13 | 1 OR 2 OR 3 OR 4 OR 5 OR 6 OR 7 OR 8 OR 9 OR 10 OR 11 OR 12 | 9009  |

|   | CINAHL on Ebscohost<br>22/07/2021                                                                                                                                                                                                                                                         | Items |
|---|-------------------------------------------------------------------------------------------------------------------------------------------------------------------------------------------------------------------------------------------------------------------------------------------|-------|
| 1 | social N1 prescri* OR patient N1 navigator* OR linkworker* OR link N1 worker* OR lay N1 health N1 worker* OR community N1 referral* OR community N1 navigator* OR community N1 facilitator* OR community N1 health N1 worker* OR community N1 health N1 advisor* OR wellbeing N1 program* | 7147  |

|   | PSYCHINFO on Ebscohost<br>22/07/2021                                                                                                                                                                                                                                                      | Items |
|---|-------------------------------------------------------------------------------------------------------------------------------------------------------------------------------------------------------------------------------------------------------------------------------------------|-------|
| 1 | social N1 prescri* OR patient N1 navigator* OR linkworker* OR link N1 worker* OR lay N1 health N1 worker* OR community N1 referral* OR community N1 navigator* OR community N1 facilitator* OR community N1 health N1 worker* OR community N1 health N1 advisor* OR wellbeing N1 program* | 3031  |

|  |  |  |
|--|--|--|
|  |  |  |
|--|--|--|

|   | WEB OF SCIENCE, Science & Social Science Citation Indexes on Clarivate<br>22/07/2021                                                                                                                                                                                                                                                            | Items |
|---|-------------------------------------------------------------------------------------------------------------------------------------------------------------------------------------------------------------------------------------------------------------------------------------------------------------------------------------------------|-------|
| 1 | TS=(social NEAR/1 prescri* OR patient NEAR/1 navigator* OR linkworker* link NEAR/1 worker* OR lay NEAR/1 health NEAR/1 worker* OR community NEAR/1 referral* OR community NEAR/1 navigator* OR community NEAR/1 facilitator* OR community NEAR/1 health NEAR/1 worker* OR community NEAR/1 health NEAR/1 advisor* OR wellbeing NEAR/1 program*) | 7548  |
| 2 | Limit 1 to articles, meeting, conference abstracts                                                                                                                                                                                                                                                                                              | 7219  |

|   | COCHRANE LIBRARY and Central Registry of Clinical Trials<br>22/07/2021                                                                                                           | Items |
|---|----------------------------------------------------------------------------------------------------------------------------------------------------------------------------------|-------|
| 1 | wellbeing NEAR/1 program*:ti,ab,kw                                                                                                                                               | 65    |
| 2 | (community NEAR/1 health NEAR/1 advisor* OR community NEAR/1 health NEAR/1 worker*):ti,ab,kw                                                                                     | 1691  |
| 3 | (community NEAR/1 facilitator*OR community NEAR/1 navigator* OR community NEAR/1 referral):ti,ab,kw                                                                              | 21    |
| 4 | (lay NEAR/1 health NEAR/1 worker* OR link NEAR/1 worker* OR linkworker*):ti,ab,kw                                                                                                | 206   |
| 5 | patient NEAR/1 navigator*:ti,ab,kw                                                                                                                                               | 286   |
| 6 | social NEAR/1 prescri*:ti,ab,kw                                                                                                                                                  | 20    |
| 7 | 1 OR 2 OR 3 OR 4 OR 5 OR 6                                                                                                                                                       | 2212  |
|   | <i>The Central Registry of Clinical Trials result now includes trials data from Clinical Trials.gov [230] and WHO International Clinical Trials Registry Platform ICTRP [26]</i> |       |

|   | Global Health on OVID<br>22/07/2021                                                                                                                                                                                                                                                                                                                                                                                                                                                                                  | Items |
|---|----------------------------------------------------------------------------------------------------------------------------------------------------------------------------------------------------------------------------------------------------------------------------------------------------------------------------------------------------------------------------------------------------------------------------------------------------------------------------------------------------------------------|-------|
| 1 | (wellbeing program OR wellbeing programs OR community health advisor OR community health advisors OR community health worker OR community health workers OR community facilitator OR community facilitators OR community navigator OR community navigators OR community referral OR lay health worker OR lay health workers OR link worker OR link workers OR linkworker OR linkworkers OR patient navigator OR patient navigators OR social prescribing OR social prescription).ti,ab.                              | 8547  |
|   | EU Clinical Trials Register <a href="https://www.clinicaltrialsregister.eu/ctr-search/search">https://www.clinicaltrialsregister.eu/ctr-search/search</a><br>22/07/2021                                                                                                                                                                                                                                                                                                                                              | Items |
| 1 | "wellbeing program" OR "wellbeing programs" OR "community health advisor" OR "community health advisors" OR "community health worker" OR "community health workers" OR "community facilitator" OR "community facilitators" OR "community navigator" OR "community navigators" OR "community referral" OR "lay health worker" OR "lay health workers" OR "link worker" OR "link workers" OR linkworker OR linkworkers OR "patient navigator" OR "patient navigators" OR "social prescribing" OR "social prescription" | 0     |

|  | LILACS <a href="http://lilacs.bvsalud.org/en/">http://lilacs.bvsalud.org/en/</a><br>22/07/2021                                                                                                                | Items |
|--|---------------------------------------------------------------------------------------------------------------------------------------------------------------------------------------------------------------|-------|
|  | wellbeing program* OR community health advisor OR community health advisor* OR community health worker* OR community facilitator* OR community navigator*OR lay health worker* OR link worker* OR linkworker* | 0     |

|  |                                             |  |
|--|---------------------------------------------|--|
|  | OR patient navigator* OR social prescribing |  |
|--|---------------------------------------------|--|

## Summary of records retrieved from other sources

**Grey literature search for** Effect of link workers providing social prescribing on health outcomes and costs for adults in primary care and community settings: a systematic review".  
**Completed September 2021, updated July 2022**

### 1. Search of Websites

Relevant websites were searched manually for a social prescribing section or publications section. If a search engine was available for these sections the search term "social prescribing" and "link worker" were used. Publications listed were reviewed by title/summary for relevant evaluations. Websites were searched sequentially so reports identified previously were not retrieved from subsequent website searches. Websites were searched in September 2021, expect for the Kings fund library and Social Prescribing Network resources, which were updated in June 2022.

2. **Grey literature search Engines** were searched using terms "link worker" and "social prescribing".

### 3. Google

Google Search term "Social prescribing"

Returned 29, 800, 000

23 pages results reviewed until results repeated or irrelevant

21 web pages visited.

9 evaluations of social prescribing retrieved. All were unpublished evaluations conducted for Clinical Commissioning Groups with no controls.

1 full report was not retrieved, despite email contact with the relevant CCG.

Rest were descriptive pages of services

### 4. Google Scholar

Search term "Social prescribing"

774, 000 results, up to page 37, 21 new potentially relevant reports retrieved. 0 titles added. 3 protocols, 12 design, 3 reviews, 2 wrong intervention, 1 population.

### 5. Economic Search

CEA registry (<https://cear.tuftsmedicalcenter.org/>) and York Centre for Reviews and Dissemination (<https://www.crd.york.ac.uk/CRDWeb/ResultsPage.asp>) search engines were searched with key words "wellbeing program OR wellbeing programs OR community health advisor OR community health advisors OR community health worker OR community health workers OR community facilitator OR community facilitators OR community navigator OR community navigators OR community referral OR lay health worker OR lay health workers OR link worker OR link workers OR linkworker OR linkworkers OR patient navigator OR patient navigators OR social prescribing OR social prescription".

Table 1: Details of Grey literature search including reasons retrieved reports were excluded

| Websites                              | Results returned | Records reviewed | Reasons not included |              |             |            |                  |               |          |  |
|---------------------------------------|------------------|------------------|----------------------|--------------|-------------|------------|------------------|---------------|----------|--|
|                                       |                  |                  | Design               | Intervention | Publication | Population | Already included | Not retrieved | Setting  |  |
| Kings Fund                            | 77               | 77               | 17                   | 11           | 48          |            |                  | 1             |          |  |
| Social Prescribing Network            | 69               | 69               | 19                   | 14           | 32          | 3          |                  |               | 1        |  |
| HSE Social Prescribing                | 3                | 1                | 1                    |              |             |            |                  |               |          |  |
| ESRI                                  | 2                | 0                |                      |              |             |            |                  |               |          |  |
| NHS                                   | 0                |                  |                      |              |             |            |                  |               |          |  |
| Social Prescribing Academy            | 0                |                  |                      |              |             |            |                  |               |          |  |
| Health Foundation                     | 3                | 3                | 2                    | 1            |             |            |                  |               |          |  |
| Nuffield Trust                        | 1                | 1                | 1                    |              |             |            |                  |               |          |  |
| Oxford Social Prescribing Network     | 5                | 5                | 3                    | 1            | 1           |            |                  |               |          |  |
| NICE                                  | 136              | 11               | 8                    |              | 3           |            |                  |               |          |  |
| <b>Total=</b>                         | <b>296</b>       | <b>167</b>       | <b>51</b>            | <b>27</b>    | <b>84</b>   | <b>3</b>   | <b>1</b>         |               | <b>1</b> |  |
| <b>Grey literature search engines</b> |                  |                  |                      |              |             |            |                  |               |          |  |
| HSE Lenus                             | 44               | 0                |                      |              |             |            |                  |               |          |  |
| Rian                                  | 2                | 2                | 1                    |              | 1           |            |                  |               |          |  |
| DART Europe                           | 2                | 0                |                      |              |             |            |                  |               |          |  |
| Open Grey                             | 2                | 1                | 1                    |              |             |            |                  |               |          |  |
| WHOLIS                                | 0                |                  |                      |              |             |            |                  |               |          |  |
| Google                                | N/A              | 9                | 8                    |              |             |            |                  |               | 1        |  |
| Google Scholar                        | N/A              | 21               | 12                   | 2            | 6           | 1          |                  |               |          |  |
| <b>Total=</b>                         | <b>50</b>        | <b>33</b>        | <b>22</b>            | <b>2</b>     | <b>7</b>    | <b>1</b>   | <b>0</b>         | <b>1</b>      | <b>0</b> |  |
| <b>Economic Search Engines</b>        |                  |                  |                      |              |             |            |                  |               |          |  |
| CEA Register                          | 33               | 33               |                      | 30           |             | 3          |                  |               |          |  |
| CRD York                              | 27               | 27               |                      | 17           | 6           | 4          |                  |               |          |  |
| <b>Total=</b>                         | <b>60</b>        | <b>60</b>        |                      | <b>47</b>    | <b>6</b>    | <b>7</b>   |                  |               |          |  |

## Citation Searches

1. Systematic reviews identified in the search were reviewed to identify any additional evaluations referenced or included in the review.
2. Backward citation search was conducted by reviewing references of included articles.
3. Forward citation search was conducted using Web of Science and updated in June 2022.
4. Citation searches were conducted independently by BK and MOS and any discrepancies agreed through discussion.

Table 2: Details of Citation Searches included number records reviewed from each source and reasons excluded.

| Citation searches | Systematic Reviews | Backward  | Forward   | Total      |
|-------------------|--------------------|-----------|-----------|------------|
| Intervention      | 43                 | 5         | 27        | 75         |
| Setting           | 2                  |           | 3         | 5          |
| Design            | 17                 | 5         | 21        | 43         |
| Publication       | 3                  |           | 9         | 12         |
| Population        | 0                  | 1         | 1         | 2          |
| Other             |                    |           | 1         | 1          |
| <b>Total</b>      | <b>65</b>          | <b>11</b> | <b>62</b> | <b>138</b> |
