# Supplementary material
Source: HighWire-hosted journal article supplement (https://bmjopen.bmj.com/content/12/10/e062951)
Supplement: inline-supplementary-material-4 [file inline-supplementary-material-4.pdf]

| Study ID                        | HRQOL Allocation concealment               | Baseline outcome measurements similar            | Baseline characteristics similar                                                           | Incomplete outcome data                                                                                | Knowledge of the allocated interventions adequately prevented during the study                                                  | Protection against contamination                                                                                                                                                                  | Selective outcome reporting         | Other risks of bias                                                                                                                 | Overall Judgement per study                                                                                                                                                                                                           | Overall judgement for outcome            |
|---------------------------------|--------------------------------------------|--------------------------------------------------|--------------------------------------------------------------------------------------------|--------------------------------------------------------------------------------------------------------|---------------------------------------------------------------------------------------------------------------------------------|---------------------------------------------------------------------------------------------------------------------------------------------------------------------------------------------------|-------------------------------------|-------------------------------------------------------------------------------------------------------------------------------------|---------------------------------------------------------------------------------------------------------------------------------------------------------------------------------------------------------------------------------------|------------------------------------------|
| Kangovi et al, 2018, RCT, SF-12 | Low risk: centralised randomisation scheme | Low risk: Baseline outcome measures were similar | Low risk: there were slightly more participants of hispanic ethnicity in one arm-0 vs 3.7% | Low risk: 79% and 81% f/up in int and control and multiple imputation techniques used for missing data | Unclear risk: not possible to blind to intervention and outcome was patient reported, although RAs collecting data were blinded | Unclear risk: randomisation was at the patient level, however unlikely controls received the intervention, but not explicitly stated whether intervention was available outside the trial setting | Low risk: all outcomes are reported | Unclear: The authors offer commercial consulting services on setting up similar CHW interventions since 2018 after this publication | Low risk: low risk of bias in 6/9 areas, and other areas unlikely to have significant impact on ROB. While the paper is at risk of overly presenting positive findings all outcomes are reported along with statistical significance. |                                          |
| Kangovi et al, 2017, RCT, SF-12 | Low risk: centralised randomisation scheme | Low risk: Baseline outcome measures were similar | Low risk: Intervention group were more likely to be employed 20% vs 8%                     | Low risk: 88% and 87% complete data, multiple imputation                                               | Unclear risk: not possible to blind to intervention and outcome was patient reported,                                           | Unclear risk: randomisation was at the patient level, however unlikely they received                                                                                                              | Low risk: all outcomes are reported | Unclear-The authors offer commercial consulting services on setting up                                                              | Low risk: low risk of bias in 6/9 areas, and other areas unlikely to have                                                                                                                                                             | Summary Judgement RCTs: Low risk of bias |

|                                    |                                                                                                                 |                                                                                                                                            |                                                                                                 |                                                                                                                               |                                                                                  |                                                                           |                                      |                                                                                            |                                                                                                                                                             |
|------------------------------------|-----------------------------------------------------------------------------------------------------------------|--------------------------------------------------------------------------------------------------------------------------------------------|-------------------------------------------------------------------------------------------------|-------------------------------------------------------------------------------------------------------------------------------|----------------------------------------------------------------------------------|---------------------------------------------------------------------------|--------------------------------------|--------------------------------------------------------------------------------------------|-------------------------------------------------------------------------------------------------------------------------------------------------------------|
|                                    |                                                                                                                 |                                                                                                                                            |                                                                                                 |                                                                                                                               | although RAs collecting data were blinded                                        | controls received the intervention, so not a major factor for overall ROB |                                      | similar CHW interventions                                                                  | significant impact on ROB. While the paper is at risk of overly presenting positive findings all outcomes are reported along with statistical significance. |
| Dickens et al, 2011, CBA, SF-12    | High risk: CBA and evidence of selection bias with those from more deprived backgrounds not being offered entry | Low risk: significant differences in baseline scores, although linear regression model used which would have corrected for baseline scores | High risk: differences in baseline characteristics although these were adjusted for in analysis | Low risk: low rates of missing data, 84% follow up intervention and 93% control and did separate paired and unpaired analysis | Unclear risk-unclear how follow up assessments were done, by whom and if blinded | Low risk: the service was not available in areas where the control lived  | Low risk: all outcomes were reported | Low risk: No other risks identified. Funded by NHS Devon, no competing interests declared. | High risk: high risk or unclear risk in 4 of 9 areas                                                                                                        |
| Dickens et al, 2011, CBA, EQ-5D-3L | High risk: CBA and evidence of selection bias with those from more deprived backgrounds not being offered entry | Low risk: significant differences in baseline scores, although linear regression model used which would                                    | High risk: differences in baseline characteristics although these were adjusted for in analysis | Low risk: low rates of missing data, 84% follow up intervention and 96% control                                               | Unclear risk-unclear how follow up assessments were done, by whom and if blinded | Low risk: the service was not available in areas where the control lived  | Low risk: all outcomes were reported | Low risk: No other risks identified. Funded by NHS Devon, no competing interests declared. | High risk: high risk or unclear risk in 4 of 9 areas                                                                                                        |

|                                                                     |                                                                                            |                                                                                                        |                                                               |                                                                                                 |                                                                                 |                                             |                                                                                                      |                                                     |                                                                                                                            |  |  |
|---------------------------------------------------------------------|--------------------------------------------------------------------------------------------|--------------------------------------------------------------------------------------------------------|---------------------------------------------------------------|-------------------------------------------------------------------------------------------------|---------------------------------------------------------------------------------|---------------------------------------------|------------------------------------------------------------------------------------------------------|-----------------------------------------------------|----------------------------------------------------------------------------------------------------------------------------|--|--|
|                                                                     | have corrected for baseline scores                                                         |                                                                                                        |                                                               |                                                                                                 |                                                                                 |                                             |                                                                                                      |                                                     |                                                                                                                            |  |  |
| <p>Unclear risk: practices randomly assigned but how not stated</p> | <p>Low risk: significant differences in baseline- explicitly corrected for in analysis</p> | <p>High risk: differences in baseline characteristics although these were adjusted for in analysis</p> | <p>Low risk: 76% follow up int, 92% control, ITT analysis</p> | <p>High risk: due to the nature of the intervention not possible to assess outcomes blindly</p> | <p>Low risk: the service was not available in areas where the control lived</p> | <p>Low risk: all outcomes were reported</p> | <p>Low risk: No other risks identified. Funded by NHS Scotland, no competing interests declared.</p> | <p>Unclear or High risk of bias in 4 of 9 areas</p> | <p>Summary Judgement NRCTS: High risk of Bias due to non randomised design and challenge of finding suitable controls.</p> |  |  |

Mental Health

| Study ID                                  | Allocation concealment                                                                           | Baseline outcome measurements similar                                                | Baseline characteristics similar                                                                         | Incomplete outcome data                                                                                | Knowledge of the allocated interventions adequately prevented during the study                                | Protection against contamination                                                                                             | Selective outcome reporting          | Other risks of bias                                                                                     | Overall Judgement per study                                                                               | Overall judgement for outcome            |
|-------------------------------------------|--------------------------------------------------------------------------------------------------|--------------------------------------------------------------------------------------|----------------------------------------------------------------------------------------------------------|--------------------------------------------------------------------------------------------------------|---------------------------------------------------------------------------------------------------------------|------------------------------------------------------------------------------------------------------------------------------|--------------------------------------|---------------------------------------------------------------------------------------------------------|-----------------------------------------------------------------------------------------------------------|------------------------------------------|
| Grant et al, 2000, RCT, HADS A and HADS D | Low risk: sealed opaque envelopes, while there was an early error- this was identified and those | Low risk: no important differences and baseline scores were adjusted for in analysis | low risk: control were slightly more likely to be male and younger but otherwise comparable, this had no | Low risk: similar amounts of missing data in both arms, at 67%, however this reduced power to detect a | High risk: due to the nature of the intervention not possible to blind participants and self reported outcome | Unclear risk: randomisation was at the patient level within practices, unclear if the intervention was available outside the | Low risk: all outcomes were reported | Low risk: No other risks identified. Funded by Avon health autothirty, no competing interests declared. | Low risk: low risk in 7 of 9 areas, blinding very challenging given nature of intervention and were using | Summary Judgement RCTs: low risk of bias |

|                                            | participants excluded                                                                  | impact on results when adjusted for in analysis                                                                                            | difference as required sample size was 161                                                                                                                                       |                                                                                                                  | trial-suggestion it was already running, so people may have received it before entering the trial                   |                                                                          | validated PROMs                                                                                                  |                                                      |
|--------------------------------------------|----------------------------------------------------------------------------------------|--------------------------------------------------------------------------------------------------------------------------------------------|----------------------------------------------------------------------------------------------------------------------------------------------------------------------------------|------------------------------------------------------------------------------------------------------------------|---------------------------------------------------------------------------------------------------------------------|--------------------------------------------------------------------------|------------------------------------------------------------------------------------------------------------------|------------------------------------------------------|
| Carnes et al, 2017, CBA, HADS A and HADS D | High risk: CBA                                                                         | Low risk: significant differences in baseline scores, although linear regression model used which would have corrected for baseline scores | High risk: significant differences in living arrangements, education, work status, adjustments for same did not significantly alter results, suggesting other unknown imbalances | High risk: control follow up 43%, int 35%, no data on whether those LTFup had different baseline characteristics | High risk: due to the nature of the intervention not possible to assess outcomes blindly and patients self reported | Low risk: the service was not available in areas where the control lived | Low risk: No other risks identified. Funded by DoH, independent research group, no competing interests declared. | High risk: high risk in 5 of 9 areas                 |
| Dickens et al, 2011, CBA, GDS              | High risk: CBA and evidence of selection bias with those from more deprived background | Low risk: significant differences in baseline scores, although linear regression model used                                                | High risk: differences in baseline characteristics although these were adjusted for in analysis                                                                                  | Low risk: low rates of missing data, 84% follow up intervention and 96% control                                  | Unclear risk: due to the nature of the intervention not possible to blind participants and unclear                  | Low risk: the service was not available in areas where the control lived | Low risk: No other risks identified. Funded by NHS Hackney CCG, no competing                                     | High risk: high risk or unclear risk in 4 of 9 areas |

|                                                                                                                                                      |                                                              |                                                                                     |                                                                                                 |                                          |                                                                                                                                                 |                                                                          |                                      |                                                                                               |                                              |  |
|------------------------------------------------------------------------------------------------------------------------------------------------------|--------------------------------------------------------------|-------------------------------------------------------------------------------------|-------------------------------------------------------------------------------------------------|------------------------------------------|-------------------------------------------------------------------------------------------------------------------------------------------------|--------------------------------------------------------------------------|--------------------------------------|-----------------------------------------------------------------------------------------------|----------------------------------------------|--|
|                                                                                                                                                      | s not being offered entry                                    | which would have corrected for baseline scores                                      |                                                                                                 |                                          | how follow up collected                                                                                                                         |                                                                          |                                      | interests declared.                                                                           |                                              |  |
| Mercer et al, 2019, CBA, HADS A and HADS D                                                                                                           | Unclear risk: practices randomly assigned but how not stated | Low risk: significant differences in baseline- explicitly corrected for in analysis | High risk: differences in baseline characteristics although these were adjusted for in analysis | Low risk: 76% follow up int, 92% control | High risk: due to the nature of the intervention not possible to assess outcomes blindly and patients self reported, statisticians were blinded | Low risk: the service was not available in areas where the control lived | Low risk: all outcomes were reported | Low risk: No other risks identified. Funded by NHS Scotland, no competing interests declared. | High or unclear risk of bias in 4 of 9 areas |  |
| Summary Judgement nRCTs: high risk of bias due to difficulty in concealing allocation, baseline differences in control groups, non randomised design |                                                              |                                                                                     |                                                                                                 |                                          |                                                                                                                                                 |                                                                          |                                      |                                                                                               |                                              |  |

Social Contacts

|                   |                                                                                                      |                                                     |                                                                        |                                                                                                   |                                                                |                                                                                             |                                                                                        |                                                                        |                                                            |                                                                                                      |
|-------------------|------------------------------------------------------------------------------------------------------|-----------------------------------------------------|------------------------------------------------------------------------|---------------------------------------------------------------------------------------------------|----------------------------------------------------------------|---------------------------------------------------------------------------------------------|----------------------------------------------------------------------------------------|------------------------------------------------------------------------|------------------------------------------------------------|------------------------------------------------------------------------------------------------------|
| Clarke et al, RCT | Unclear risk- register of all >75s living alone compiled and arranged into deciles by social contact | Unclear risk- Method of randomisation not specified | Low risk- reported and no significant differences in baseline outcomes | High risk- characteristics such as age, gender, education etc not reported, only baseline outcome | Low risk- similar loss to follow up in both arms, with reasons | Unclear risk- participants would be aware of their allocation, although interview assessors | Low risk- while randomised at patient level it seems very unlikely control group would | Low risk- all outcomes reported at baseline were reported at follow up | Low risk- publicly funded, no competing interests declared | Low risk- while some areas unclear due to lack of reporting, unlikely to affect outcome, low risk in |
|-------------------|------------------------------------------------------------------------------------------------------|-----------------------------------------------------|------------------------------------------------------------------------|---------------------------------------------------------------------------------------------------|----------------------------------------------------------------|---------------------------------------------------------------------------------------------|----------------------------------------------------------------------------------------|------------------------------------------------------------------------|------------------------------------------------------------|------------------------------------------------------------------------------------------------------|

|                                        |                                                                                              |                                                                                                                       |                                                                                      |                                                                                                                                                          |                                                                                                                                                   |                                                                                                            |                                                                                                                                                                                                |                                      |                                                                                                        |                                                 |                                                                                                 |
|----------------------------------------|----------------------------------------------------------------------------------------------|-----------------------------------------------------------------------------------------------------------------------|--------------------------------------------------------------------------------------|----------------------------------------------------------------------------------------------------------------------------------------------------------|---------------------------------------------------------------------------------------------------------------------------------------------------|------------------------------------------------------------------------------------------------------------|------------------------------------------------------------------------------------------------------------------------------------------------------------------------------------------------|--------------------------------------|--------------------------------------------------------------------------------------------------------|-------------------------------------------------|-------------------------------------------------------------------------------------------------|
|                                        | score and randomly allocated into control and experimental arms-how randomised not specified |                                                                                                                       |                                                                                      | measures referred to as characteristics                                                                                                                  |                                                                                                                                                   | were blinded                                                                                               | have received intervention as it was not available other than through the trial                                                                                                                |                                      |                                                                                                        | 5 of 9 areas                                    |                                                                                                 |
| Grant et al 2000, RCT, Dukes UNC score | Low risk: Sequenced numbered envelopes prepared by research team, block randomisation        | Low risk: sealed opaque envelopes, however reported that there were issues in early stages and some patients excluded | Low risk: no important differences and baseline scores were adjusted for in analysis | low risk: control were slightly more likely to be male and younger but otherwise comparable, this had no impact on results when adjusted for in analysis | Low risk: similar amounts of missing data in both arms, at 67%, however this reduced power to detect a difference as required sample size was 161 | High risk: due to the nature of the intervention not possible to assess outcomes blindly and self reported | Unclear risk: randomisation was at the patient level within practices, unclear if the intervention was running in the local area so possible patients could have accessed it outside the trial | Low risk: all outcomes were reported | Low risk: No other risks identified. Funded by Avon health authority, no competing interests declared. | Low risk: 7 of 9 areas                          | Low risk: Both RCTs mainly low risk- risks arise from poor reporting and nature of intervention |
| Dickens et al, 2011, CBA, MOS-6        | High risk: controlled before after study                                                     | High risk: CBA and evidence of selection                                                                              | Low risk: significant differences in baseline scores,                                | High risk: differences in baseline characteristics                                                                                                       | Low risk: low rates of missing data, 84% follow up                                                                                                | Unclear risk: due to the nature of the intervention                                                        | Low risk: the service was not available in areas                                                                                                                                               | Low risk: all outcomes were reported | Low risk: No other risks identified. Funded by                                                         | High risk: high or unclear risk in 4 of 9 areas | High risk: only one CBA and it is at high risk of bias                                          |

|                                              |                                                                        |                                                                                      |                                              |                              |                                                                       |                         |                                                |  |  |
|----------------------------------------------|------------------------------------------------------------------------|--------------------------------------------------------------------------------------|----------------------------------------------|------------------------------|-----------------------------------------------------------------------|-------------------------|------------------------------------------------|--|--|
|                                              | bias with those from more deprived backgrounds not being offered entry | although linear regression model used which would have corrected for baseline scores | although these were adjusted for in analysis | intervention and 96% control | n cannot blind participants and not stated how outcomes were assessed | where the control lived | NHS Scotland, no competing interests declared. |  |  |
| Overall:<br>Low risk: Evidence from two RCTs |                                                                        |                                                                                      |                                              |                              |                                                                       |                         |                                                |  |  |

Physical Activity

|                         |                                                                                                                                                                                                  |                                                    |                                                                       |                                                                                                                                  |                                                               |                                                                                                         |                                                                                                                                                                       |                                                                        |                                                            |                                                                                                                  |
|-------------------------|--------------------------------------------------------------------------------------------------------------------------------------------------------------------------------------------------|----------------------------------------------------|-----------------------------------------------------------------------|----------------------------------------------------------------------------------------------------------------------------------|---------------------------------------------------------------|---------------------------------------------------------------------------------------------------------|-----------------------------------------------------------------------------------------------------------------------------------------------------------------------|------------------------------------------------------------------------|------------------------------------------------------------|------------------------------------------------------------------------------------------------------------------|
| Clarke et al, RCT, ADLs | Unclear risk-register of all >75s living alone compiled and arranged into deciles by social contact score and randomly allocated into control and experimental arms-how randomised not specified | Unclear risk-Method of randomisation not specified | Low risk-reported and no significant differences in baseline outcomes | High risk-characteristics such as age, education etc not reported, only baseline outcome measures referred to as characteristics | Low risk-similar loss to follow up in both arms, with reasons | Unclear risk-participants would be aware of their allocation, although interview assessors were blinded | Low risk-while randomised at patient level it seems very unlikely control group would have received intervention as it was not available other than through the trial | Low risk- all outcomes reported at baseline were reported at follow up | Low risk- publicly funded, no competing interests declared | Low risk-while some areas unclear due to lack of reporting, unlikely to affect outcome, low risk in 5 of 9 areas |
|-------------------------|--------------------------------------------------------------------------------------------------------------------------------------------------------------------------------------------------|----------------------------------------------------|-----------------------------------------------------------------------|----------------------------------------------------------------------------------------------------------------------------------|---------------------------------------------------------------|---------------------------------------------------------------------------------------------------------|-----------------------------------------------------------------------------------------------------------------------------------------------------------------------|------------------------------------------------------------------------|------------------------------------------------------------|------------------------------------------------------------------------------------------------------------------|

|                                                    |                                                                                       |                                   |                                                                                                                                            |                                                                                                                                                                                 |                                                                                                                                                   |                                                                                                                     |                                                                                                                                                                       |                                      |                                                                                                                  |                                      |                                                                           |
|----------------------------------------------------|---------------------------------------------------------------------------------------|-----------------------------------|--------------------------------------------------------------------------------------------------------------------------------------------|---------------------------------------------------------------------------------------------------------------------------------------------------------------------------------|---------------------------------------------------------------------------------------------------------------------------------------------------|---------------------------------------------------------------------------------------------------------------------|-----------------------------------------------------------------------------------------------------------------------------------------------------------------------|--------------------------------------|------------------------------------------------------------------------------------------------------------------|--------------------------------------|---------------------------------------------------------------------------|
| Grant et al 2000, RCT, COOP Wonca Daily Activities | Low risk: Sequenced numbered envelopes prepared by research team, block randomisation | Low risk: sealed opaque envelopes | Low risk: no important differences and baseline scores were adjusted for in analysis                                                       | low risk: control were slightly more likely to be male and younger but otherwise comparable, this had no impact on results when adjusted for in analysis                        | Low risk: similar amounts of missing data in both arms, at 67%, however this reduced power to detect a difference as required sample size was 161 | Unclear risk: due to the nature of the intervention not possible to blind participants but assessors blinded        | Unclear risk: randomisation was at the patient level within practices, unclear if it participants could self refer to the project which was running in the local area | Low risk: all outcomes were reported | Low risk: No other risks identified. Funded by Avon health authority, no competing interests declared.           | Low risk: low risk in 7 of 9 areas   | Overall RCTs: Low risk, most evidence comes from RCTs at low risk of bias |
| Carnes et al, 2017, CBA, Number regular activities | High risk: controlled before after study                                              | High risk: CBA                    | low risk: significant differences in baseline scores, although linear regression model used which would have corrected for baseline scores | High risk: significant differences in living arrangement, education, work status, adjustments for same did not significantly alter results, suggesting other unknown imbalances | High risk: control follow up 43%, intervention 35%, no data on whether those LTFup had different baseline characteristics                         | High risk: due to the nature of the intervention not possible to assess outcomes blindly and patients self reported | Low risk: the service was not available in areas where the control lived                                                                                              | Low risk: all outcomes were reported | Low risk: No other risks identified. Funded by DoH, independent research group, no competing interests declared. | High risk: high risk in 5 of 9 areas |                                                                           |



|                                                                                                                                                                      |                                                 |                                                                     |                                                                                            |                                                                                                        |                                                 |                                                                                                                   |                                                                                 |                                             |                                                                                                         |                                                        |                                                                                                   |
|----------------------------------------------------------------------------------------------------------------------------------------------------------------------|-------------------------------------------------|---------------------------------------------------------------------|--------------------------------------------------------------------------------------------|--------------------------------------------------------------------------------------------------------|-------------------------------------------------|-------------------------------------------------------------------------------------------------------------------|---------------------------------------------------------------------------------|---------------------------------------------|---------------------------------------------------------------------------------------------------------|--------------------------------------------------------|---------------------------------------------------------------------------------------------------|
| <p>Mercer et al, 2019, CBA, Physical activity</p>                                                                                                                    | <p>High risk: controlled before after study</p> | <p>Unclear risk: practices randomly assigned but how not stated</p> | <p>Low risk: significant differences in baseline- explicitly corrected for in analysis</p> | <p>High risk: differences in baseline characteristics although these were adjusted for in analysis</p> | <p>Low risk: 76% follow up int, 92% control</p> | <p>High risk: due to the nature of the intervention not possible to assess outcomes blindly and self reported</p> | <p>Low risk: the service was not available in areas where the control lived</p> | <p>Low risk: all outcomes were reported</p> | <p>Low risk: No other risks identified. Funded by NHS Hackney CCG, no competing interests declared.</p> | <p>High risk: High or unclear risk in 4 of 9 areas</p> | <p>Overall nRCTs: High Risk: One study at very high risk of bias and one at high risk of bias</p> |
| <p>Overall: High risk due to inclusion of CBAs, without these low risk, although some concerns about allocation concealment that is inherent to the intervention</p> |                                                 |                                                                     |                                                                                            |                                                                                                        |                                                 |                                                                                                                   |                                                                                 |                                             |                                                                                                         |                                                        |                                                                                                   |

Health Care Utilisation

|                                               |                                                                                                                                                                         |                                                            |                                                                               |                                                                                                                                          |                                                                       |                                                                                                                                                 |                                                                                                                                                             |                                                     |                                                                   |                                                                                                                          |
|-----------------------------------------------|-------------------------------------------------------------------------------------------------------------------------------------------------------------------------|------------------------------------------------------------|-------------------------------------------------------------------------------|------------------------------------------------------------------------------------------------------------------------------------------|-----------------------------------------------------------------------|-------------------------------------------------------------------------------------------------------------------------------------------------|-------------------------------------------------------------------------------------------------------------------------------------------------------------|-----------------------------------------------------|-------------------------------------------------------------------|--------------------------------------------------------------------------------------------------------------------------|
| <p>Clarke et al, RCT, Primary care visits</p> | <p>Unclear risk- register of all &gt;75s living alone compiled and arranged into deciles by cosial contact score and randomly allocated into control and experiment</p> | <p>Unclear risk- Method of randomisation not specified</p> | <p>Low risk- reported and no significant differences in baseline outcomes</p> | <p>High risk- characteristics such as age, education etc not reported, only baseline outcome measures referred to as characteristics</p> | <p>Low risk- similar loss to follow up in both arms, with reasons</p> | <p>Low risk- participants would be aware of their allocation, although interview assessors were blinded. HCU was self reported to assessors</p> | <p>Low risk- while randomised at patient level it seems very unlikely control group would have received intervention as it was not available other than</p> | <p>Low risk- all outcomes reported at follow up</p> | <p>Low risk- publicly funded, no competing interests declared</p> | <p>Low risk- while some areas unclear due to lack of reporting, unlikely to affect outcome, low risk in 5 of 9 areas</p> |
|-----------------------------------------------|-------------------------------------------------------------------------------------------------------------------------------------------------------------------------|------------------------------------------------------------|-------------------------------------------------------------------------------|------------------------------------------------------------------------------------------------------------------------------------------|-----------------------------------------------------------------------|-------------------------------------------------------------------------------------------------------------------------------------------------|-------------------------------------------------------------------------------------------------------------------------------------------------------------|-----------------------------------------------------|-------------------------------------------------------------------|--------------------------------------------------------------------------------------------------------------------------|

|                                                                  |                                                                                                            |                                            |                                                                                      |                                                                                                                                                          |                                                                                       |                                                                                                       |                                                                                                                         |                                      |                                                                                                        |                                                                                                                                                      |
|------------------------------------------------------------------|------------------------------------------------------------------------------------------------------------|--------------------------------------------|--------------------------------------------------------------------------------------|----------------------------------------------------------------------------------------------------------------------------------------------------------|---------------------------------------------------------------------------------------|-------------------------------------------------------------------------------------------------------|-------------------------------------------------------------------------------------------------------------------------|--------------------------------------|--------------------------------------------------------------------------------------------------------|------------------------------------------------------------------------------------------------------------------------------------------------------|
|                                                                  | al arms-how randomised not specified                                                                       |                                            |                                                                                      |                                                                                                                                                          |                                                                                       |                                                                                                       | through the trial                                                                                                       |                                      |                                                                                                        |                                                                                                                                                      |
| Grant et al 2000, RCT, PC visits, referrals, medications         | Low risk: Sequenced numbered envelopes prepared by research team, block randomisation                      | Low risk: sealed opaque envelopes          | Low risk: no important differences and baseline scores were adjusted for in analysis | low risk: control were slightly more likely to be male and younger but otherwise comparable, this had no impact on results when adjusted for in analysis | Low risk: similar amounts of missing data in both arms, data on HCU available for 157 | Unclear risk: not reported if assessors were blinded or how health care utilisation data was obtained | Unclear risk: randomisation was at the patient level within practices. GPs were more interested in social interventions | Low risk: all outcomes were reported | Low risk: No other risks identified. Funded by Avon health authority, no competing interests declared. | Low risk: low risk in 7 of 9 areas                                                                                                                   |
| Kangovi et al, 2018, RCT, All cause hospital admissions 9 months | Low risk: computerised generated algorithm with blocks, performed by study team member not associated with | Low risk: centralised randomisation scheme | Low risk: Baseline outcome measures were similar                                     | Low risk: there were slightly more participants of hispanic ethnicity in one arm-0 vs 3.7%                                                               | Low risk: 100% data available for health care utilisation                             | Low risk- Hospitalisation data from routine sources and assessors/statisticians were blinded.         | Low risk: randomisation was at the patient level, however unlikely they received controls the intervention, so not a    | Low risk: all outcomes are reported  | The authors offer commercial consulting services on setting up similar CHW interventions               | Low risk: low risk of bias in 7/9 areas, and other areas unlikely to have significant impact on ROB. While the paper is at risk of overly presenting |

|                                                                    |                                                                                                                                |                                            |                                                                                                              |                                                                                                               |                                                           |                                                                                               |                                                                                                                                                    |                                      |                                                                                                                  |                                                                                                                                                          |                                                                        |
|--------------------------------------------------------------------|--------------------------------------------------------------------------------------------------------------------------------|--------------------------------------------|--------------------------------------------------------------------------------------------------------------|---------------------------------------------------------------------------------------------------------------|-----------------------------------------------------------|-----------------------------------------------------------------------------------------------|----------------------------------------------------------------------------------------------------------------------------------------------------|--------------------------------------|------------------------------------------------------------------------------------------------------------------|----------------------------------------------------------------------------------------------------------------------------------------------------------|------------------------------------------------------------------------|
| outcomes assessment                                                |                                                                                                                                |                                            |                                                                                                              |                                                                                                               |                                                           |                                                                                               | major factor for overall ROB                                                                                                                       |                                      | positive findings all outcomes are reported along with statistical significance.                                 |                                                                                                                                                          |                                                                        |
| Kangovi et al, 2017, RCT, SF-12, all cause hospitalisations 1 year | Low risk: computerised generated algorithm with blocks, performed by study team member not associated with outcomes assessment | Low risk: centralised randomisation scheme | Low risk: Baseline outcome measures were similar                                                             | Low risk: Intervention group were more employed 20% vs 8%                                                     | Low risk: 100% data available for health care utilisation | Low risk- Hospitalisation data from routine sources and assessors/statisticians were blinded. | High risk: randomisation was at the patient level, however unlikely they received controls the intervention, so not a major factor for overall ROB | Low risk: all outcomes are reported  | The authors offer commercial consulting services on setting up similar CHW interventions                         | Low risk- low risk 7/9 areas and other domains such as allocation inherent to nature of intervention or contamination due to patient level randomisation | Overall RCTs: Low risk of bias                                         |
| Carnes et al, 2017, CBA, PC visits                                 | High risk: controlled before after study                                                                                       | High risk: CBA                             | High risk: significant differences in baseline scores, and controls were drawn from same population, but not | High risk: significant differences in living arrangement, education, work status, adjustment for same did not | Low risk: use of anonymised GP data meant no missing data | Low risk- anonymised data from GP records                                                     | Low risk: the service was not available in areas where the control lived                                                                           | Low risk: all outcomes were reported | Low risk: No other risks identified. Funded by DoH, independent research group, no competing interests declared. | High risk: high risk in 4 of 9 areas                                                                                                                     | Overall nRCTs: High risk of bias due to control mismatch in particular |
